# Supplementary material
Source: PubMed Central journal article supplement (PMC6615901)
Supplement: NIHMS1037386-supplement-1.pdf [file NIHMS1037386-supplement-1.pdf]

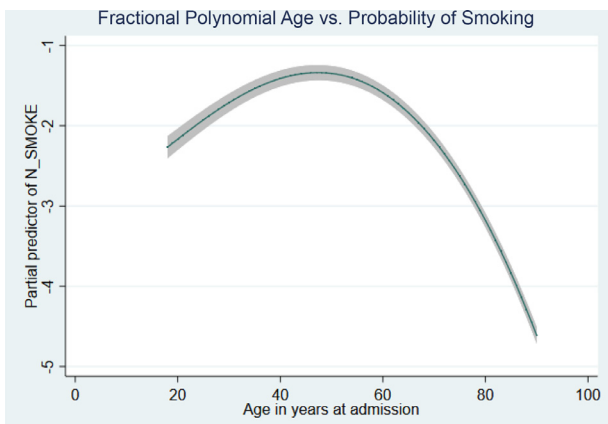

**Supplementary Figure 1** Age as a function of probability of tobacco use disorder. Adjusted multivariable fractional polynomial models were used to demonstrate age as a function of probability of tobacco use disorder. N\_SMOKE = tobacco use disorder.

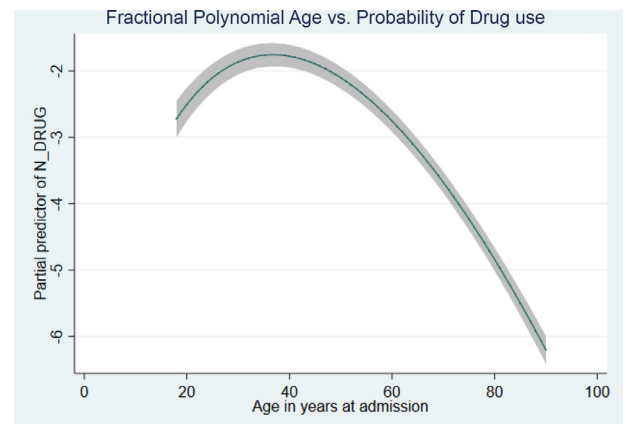

**Supplementary Figure 3** Age as a function of probability of drug use disorder. Adjusted multivariable fractional polynomial models were used to demonstrate age as a function of probability of drug use disorder. N\_DRUG = drug use disorder.

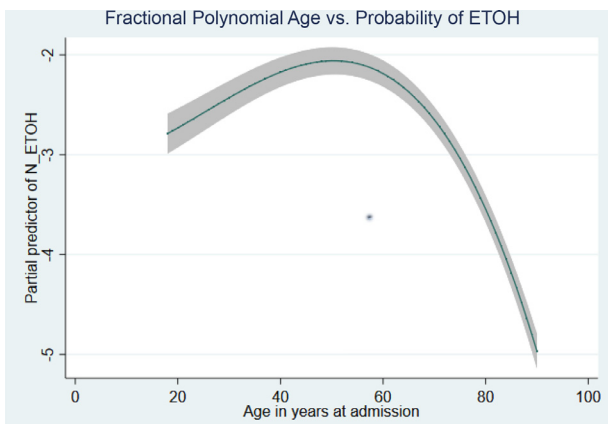

**Supplementary Figure 2** Age as a function of probability of alcohol use disorder. Adjusted multivariable fractional polynomial models were used to demonstrate age as a function of probability of alcohol use disorder. N\_ETOH = alcohol use disorder.

**Supplementary Table 1** ICD-9-CM Codes Used to Identify Heart Failure Hospitalizations

| Code   | Description                                                                                                                                             |
|--------|---------------------------------------------------------------------------------------------------------------------------------------------------------|
| 398.91 | Rheumatic heart failure (congestive)                                                                                                                    |
| 402.01 | Malignant hypertensive heart disease with heart failure                                                                                                 |
| 402.11 | Benign hypertensive heart disease with heart failure                                                                                                    |
| 402.91 | Unspecified hypertensive heart disease with heart failure                                                                                               |
| 404.01 | Hypertensive heart and chronic kidney disease, malignant, with heart failure and with chronic kidney disease Stage I through Stage IV, or unspecified   |
| 404.03 | Hypertensive heart and chronic kidney disease, malignant, with heart failure and with chronic kidney disease Stage V or end-stage renal disease         |
| 404.11 | Hypertensive heart and chronic kidney disease, benign, with heart failure and with chronic kidney disease Stage I through Stage IV, or unspecified      |
| 404.13 | Hypertensive heart and chronic kidney disease, benign, with heart failure and chronic kidney disease Stage V or end-stage renal disease                 |
| 404.91 | Hypertensive heart and chronic kidney disease, unspecified, with heart failure and with chronic kidney disease Stage I through Stage IV, or unspecified |
| 404.93 | Hypertensive heart and chronic kidney disease, unspecified, with heart failure and chronic kidney disease Stage V or end-stage renal disease            |
| 428.0  | Congestive heart failure unspecified                                                                                                                    |
| 428.1  | Left heart failure                                                                                                                                      |
| 428.20 | Unspecified systolic heart failure                                                                                                                      |
| 428.21 | Acute systolic heart failure                                                                                                                            |
| 428.22 | Chronic systolic heart failure                                                                                                                          |
| 428.23 | Acute on chronic systolic heart failure                                                                                                                 |
| 428.30 | Unspecified diastolic heart failure                                                                                                                     |
| 428.31 | Acute diastolic heart failure                                                                                                                           |
| 428.32 | Chronic diastolic heart failure                                                                                                                         |
| 428.33 | Acute on chronic diastolic heart failure                                                                                                                |
| 428.40 | Unspecified combined systolic and diastolic heart failure                                                                                               |
| 428.41 | Acute combined systolic and diastolic heart failure                                                                                                     |
| 428.42 | Chronic combined systolic and diastolic heart failure                                                                                                   |
| 428.43 | Acute on chronic combined systolic and diastolic heart failure                                                                                          |
| 428.9  | Heart failure unspecified                                                                                                                               |

ICD-9-CM = International Classification of Diseases = Ninth Revision-Clinical Modification.

**Supplementary Table 2** ICD-9-CM and CCS Codes Used to Identify Tobacco, Alcohol, and Drug Use Disorders

|                           |                             |
|---------------------------|-----------------------------|
| Tobacco use ICD-9-CM code |                             |
| 305.1                     | Tobacco use disorder        |
| Alcohol use CCS code      |                             |
| 660                       | Alcohol-related disorders   |
| Drug use CCS Code         |                             |
| 661                       | Substance-related disorders |

CCS = Clinical Classifications Software; ICD-9-CM = International Classification of Diseases = Ninth Revision-Clinical Modification.

**Supplementary Table 3** ICD-9-CM Definitions Used for Drug Use Disorder Subcategories

## Cocaine use by ICD-9-CM

|       |                                  |
|-------|----------------------------------|
| 30420 | Cocaine dependence, unspecified  |
| 30421 | Cocaine dependence, continuous   |
| 30422 | Cocaine dependence, episodic     |
| 30423 | Cocaine dependence, in remission |

## Cannabis use by ICD-9-CM

|       |                                   |
|-------|-----------------------------------|
| 30430 | Cannabis dependence, unspecified  |
| 30431 | Cannabis dependence, continuous   |
| 30432 | Cannabis dependence, episodic     |
| 30433 | Cannabis dependence, in remission |
| 30520 | Cannabis abuse, unspecified       |
| 30521 | Cannabis abuse, continuous        |
| 30522 | Cannabis abuse, episodic          |
| 30523 | Cannabis abuse, in remission      |

## Opioid use by ICD-9-CM

|       |                                                                               |
|-------|-------------------------------------------------------------------------------|
| 30400 | Opioid type dependence, unspecified                                           |
| 30401 | Opioid type dependence, continuous                                            |
| 30402 | Opioid type dependence, episodic                                              |
| 30403 | Opioid type dependence, in remission                                          |
| 30470 | Combinations of opioid type drug with any other drug dependence, unspecified  |
| 30471 | Combinations of opioid type drug with any other drug dependence, continuous   |
| 30472 | Combinations of opioid type drug with any other drug dependence, episodic     |
| 30473 | Combinations of opioid type drug with any other drug dependence, in remission |
| 30550 | Opioid abuse, unspecified                                                     |
| 30551 | Opioid abuse, continuous                                                      |
| 30552 | Opioid abuse, episodic                                                        |
| 30553 | Opioid abuse, in remission                                                    |
| 76072 | Narcotics affecting fetus or newborn via placenta or breast milk              |
| 96500 | Poisoning by opium (alkaloids), unspecified                                   |
| 96501 | Poisoning by heroin                                                           |
| 96502 | Poisoning by methadone                                                        |
| 96509 | Poisoning by other opiates and related narcotics                              |

## Amphetamine use by ICD-9-CM

|       |                                                                   |
|-------|-------------------------------------------------------------------|
| 30440 | Amphetamine and other psychostimulant dependence, unspecified     |
| 30441 | Amphetamine and other psychostimulant dependence, continuous      |
| 30442 | Amphetamine and other psychostimulant dependence, episodic        |
| 30443 | Amphetamine and other psychostimulant dependence, in remission    |
| 30570 | Amphetamine or related acting sympathomimetic abuse, unspecified  |
| 30571 | Amphetamine or related acting sympathomimetic abuse, continuous   |
| 30572 | Amphetamine or related acting sympathomimetic abuse, episodic     |
| 30573 | Amphetamine or related acting sympathomimetic abuse, in remission |

## Psychotherapeutic use by ICD-9-CM

|       |                                                           |
|-------|-----------------------------------------------------------|
| 30410 | Sedative, hypnotic or anxiolytic dependence, unspecified  |
| 30411 | Sedative, hypnotic or anxiolytic dependence, continuous   |
| 30412 | Sedative, hypnotic or anxiolytic dependence, episodic     |
| 30413 | Sedative, hypnotic or anxiolytic dependence, in remission |
| 30540 | Sedative, hypnotic or anxiolytic abuse, unspecified       |
| 30541 | Sedative, hypnotic or anxiolytic abuse, continuous        |
| 30542 | Sedative, hypnotic or anxiolytic abuse, episodic          |
| 30543 | Sedative, hypnotic or anxiolytic abuse, in remission      |
| 30580 | Antidepressant type abuse, unspecified                    |
| 30581 | Antidepressant type abuse, continuous                     |
| 30582 | Antidepressant type abuse, episodic                       |
| 30583 | Antidepressant type abuse, in remission                   |

## Hallucinogen use by ICD-9-CM

|       |                                      |
|-------|--------------------------------------|
| 30450 | Hallucinogen dependence, unspecified |
| 30451 | Hallucinogen dependence, continuous  |

|                       |                                                                                                                                  |
|-----------------------|----------------------------------------------------------------------------------------------------------------------------------|
| 30452                 | Hallucinogen dependence, episodic                                                                                                |
| 30453                 | Hallucinogen dependence, in remission                                                                                            |
| 30530                 | Hallucinogen abuse, unspecified                                                                                                  |
| 30531                 | Hallucinogen abuse, continuous                                                                                                   |
| 30532                 | Hallucinogen abuse, episodic                                                                                                     |
| 30533                 | Hallucinogen abuse, in remission                                                                                                 |
| 76073                 | Hallucinogenic agents affecting fetus or newborn via placenta or breast milk                                                     |
| Other use by ICD-9-CM |                                                                                                                                  |
| 2920                  | Drug withdrawal                                                                                                                  |
| 29282                 | Drug-induced persisting dementia                                                                                                 |
| 29283                 | Drug-induced persisting amnesic disorder                                                                                         |
| 29284                 | Drug-induced mood disorder                                                                                                       |
| 29285                 | Drug induced sleep disorders                                                                                                     |
| 29289                 | Other specified drug-induced mental disorders                                                                                    |
| 2929                  | Unspecified drug-induced mental disorder                                                                                         |
| 30460                 | Other specified drug dependence, unspecified                                                                                     |
| 30461                 | Other specified drug dependence, continuous                                                                                      |
| 30462                 | Other specified drug dependence, episodic                                                                                        |
| 30463                 | Other specified drug dependence, in remission                                                                                    |
| 30480                 | Combinations of drug dependence excluding opioid type drug, unspecified                                                          |
| 30481                 | Combinations of drug dependence excluding opioid type drug, continuous                                                           |
| 30482                 | Combinations of drug dependence excluding opioid type drug, episodic                                                             |
| 30483                 | Combinations of drug dependence excluding opioid type drug, in remission                                                         |
| 30490                 | Unspecified drug dependence, unspecified                                                                                         |
| 30491                 | Unspecified drug dependence, continuous                                                                                          |
| 30492                 | Unspecified drug dependence, episodic                                                                                            |
| 30493                 | Unspecified drug dependence, in remission                                                                                        |
| 30590                 | Other, mixed, or unspecified drug abuse, unspecified                                                                             |
| 30591                 | Other, mixed, or unspecified drug abuse, continuous                                                                              |
| 30592                 | Other, mixed, or unspecified drug abuse, episodic                                                                                |
| 30593                 | Other, mixed, or unspecified drug abuse, in remission                                                                            |
| 64830                 | Drug dependence of mother, unspecified as to episode of care or not applicable                                                   |
| 64831                 | Drug dependence of mother, delivered, with or without mention of antepartum condition                                            |
| 64832                 | Drug dependence of mother, delivered, with mention of postpartum complication                                                    |
| 64833                 | Drug dependence of mother, antepartum condition or complication                                                                  |
| 64834                 | Drug dependence of mother, postpartum condition or complication                                                                  |
| 29211                 | Drug-induced psychotic disorder with delusions                                                                                   |
| 29212                 | Drug-induced psychotic disorder with hallucinations                                                                              |
| 2922                  | Pathological drug intoxication                                                                                                   |
| 29281                 | Drug-induced delirium                                                                                                            |
| 65550                 | Suspected damage to fetus from drugs, affecting management of mother, unspecified as to episode of care or not applicable        |
| 65551                 | Suspected damage to fetus from drugs, affecting management of mother, delivered, with or without mention of antepartum condition |
| 65553                 | Suspected damage to fetus from drugs, affecting management of mother, antepartum condition or complication                       |
| 7795                  | Drug withdrawal syndrome in newborn                                                                                              |
| V6542                 | Counseling on substance use and abuse                                                                                            |
